# Supplementary material for: Evidence for natural attenuation of 1,4-dioxane in a glacial aquifer system
Source: Springer Nature journal article supplement (doi:10.1007/s10040-019-02028-6), 2019-10-02
Supplement: MOESM1 [file 17233764]

**ELECTRONIC SUPPLEMENTARY MATERIAL – HYDROGEOLOGY JOURNAL**

**Evidence for natural attenuation of 1,4-dioxane in a glacial aquifer system**

Leah E. Jackson<sup>1,2</sup>, Lawrence D. Lemke<sup>1,3\*</sup>

1. Department of Earth and Atmospheric Sciences, 314 Brooks Hall, Central Michigan University, Mount Pleasant, MI 48859, USA
2. Earth and Ecosystem Science Program, Central Michigan University
3. Institute for Great Lakes Research, Central Michigan University

\*corresponding author; email: [L.D.Lemke@cmich.edu](mailto:L.D.Lemke@cmich.edu)

**Table S1.** Extraction Well Average Annual Pumping Rates (gpm)

| Year | AE3 | LB1 | LB2 | LB3 | LB4 | DOLPH | TW12 | TW-16 | TW18 | TW19 | TW21 | TW23 |
|------|-----|-----|-----|-----|-----|-------|------|-------|------|------|------|------|
| 2005 | 32  | 94  | 78  | -   | -   | 42    | 14   | -     | -    | -    | -    | -    |
| 2006 | 32  | 94  | 27  | 47  | -   | 53    | 19   | -     | 204  | -    | -    | -    |
| 2007 | 19  | 92  | -   | 84  | -   | 53    | 9    | -     | 231  | -    | -    | -    |
| 2008 | 15  | 95  | -   | 90  | -   | 56    | 2    | -     | 240  | -    | -    | -    |
| 2009 | 15  | 94  | -   | 80  | -   | 57    | -    | -     | 245  | -    | -    | -    |
| 2010 | 15  | 93  | -   | 74  | -   | 55    | -    | -     | 171  | -    | 59   | -    |
| 2011 | 3.5 | 73  | -   | 39  | -   | 33    | -    | -     | 126  | 12   | 126  | -    |
| 2012 | -   | 59  | -   | 39  | -   | 20    | -    | -     | 122  | 72   | 88   | -    |
| 2013 | -   | 77  | -   | 14  | 5.5 | 11    | -    | -     | 152  | 99   | 54   | -    |
| 2014 | -   | -   | -   | -   | 99  | 11    | -    | 5     | 158  | 96   | 57   | -    |
| 2015 | -   | -   | -   | -   | 98  | 11    | -    | 29    | 157  | 71   | 59   | -    |
| 2016 | -   | -   | -   | -   | 100 | 10    | -    | 30    | 155  | 71   | 57   | -    |
| 2017 | -   | 2   | -   | -   | 94  | 14    | -    | 4     | 153  | 46   | 60   | 43   |

**Table S2.** Annual Mass of 1,4-Dioxane Removed by Extraction Wells (kg)

| Year | AE3 | LB1 | LB2 | LB3 | LB4 | DOLPH | TW12 | TW-16 | TW18 | TW19 | TW21 | TW23 |
|------|-----|-----|-----|-----|-----|-------|------|-------|------|------|------|------|
| 2005 | 5   | 81  | 143 | -   | -   | 12    | 2    | -     | -    | -    | -    | -    |
| 2006 | 5   | 87  | 50  | 49  | -   | 12    | 2    | -     | 636  | -    | -    | -    |
| 2007 | 3   | 94  | -   | 93  | -   | 11    | 1    | -     | 343  | -    | -    | -    |
| 2008 | 3   | 94  | -   | 92  | -   | 10    | -    | -     | 232  | -    | -    | -    |
| 2009 | 3   | 83  | -   | 68  | -   | 9     | -    | -     | 162  | -    | -    | -    |
| 2010 | 4   | 94  | -   | 70  | -   | 9     | -    | -     | 109  | -    | 35   | -    |
| 2011 | 5   | 76  | -   | 41  | -   | 5     | -    | -     | 82   | 21   | 57   | -    |
| 2012 | -   | 66  | -   | 38  | -   | 2     | -    | -     | 77   | 117  | 26   | -    |
| 2013 | -   | 77  | -   | 12  | 10  | 2     | -    | -     | 96   | 145  | 14   | -    |
| 2014 | -   | -   | -   | -   | 101 | 2     | -    | 9     | 88   | 130  | 93   | -    |
| 2015 | -   | -   | -   | -   | 94  | 3     | -    | 52    | 89   | 99   | 14   | -    |
| 2016 | -   | -   | -   | -   | 93  | 2     | -    | 48    | 86   | 95   | 15   | -    |
| 2017 | -   | -   | -   | -   | 87  | 3     | -    | 6     | 182  | 59   | 21   | 31   |

**Table S3.** Lines of evidence used to evaluate 1,4-dioxane natural attenuation

| Evaluation Metric                      | Indication                                                             |
|----------------------------------------|------------------------------------------------------------------------|
| Order-of-Magnitude                     | Concentration reduction at individual wells                            |
| Point Attenuation Rates and Half-Lives | Time estimates for concentration reduction;<br>First-order decay rates |
| Bulk Attenuation                       | Plume changes (expansion, contraction, stabilization)                  |
| Mass Balance                           | Changes in 1,4-dioxane mass storage                                    |
| Spatial Moments                        | Changes in 1,4-dioxane mass and center of mass                         |

**Table S4.** Observed concentrations and calculated natural attenuation metrics at individual wells during first and second half of the study period.

| Wells    | 2005-2011                   |                                      |                                                   |                   |                                             | 2011-2017                   |                                      |                                                   |                   |                                             |
|----------|-----------------------------|--------------------------------------|---------------------------------------------------|-------------------|---------------------------------------------|-----------------------------|--------------------------------------|---------------------------------------------------|-------------------|---------------------------------------------|
|          | Maximum Concentration (ppb) | K <sub>point</sub> Decay Coefficient | P-values for K <sub>point</sub> Decay Coefficient | Half-Life (years) | Decay Time to 7.2 ppb (years from 1/1/1985) | Maximum Concentration (ppb) | K <sub>point</sub> Decay Coefficient | P-values for K <sub>point</sub> Decay Coefficient | Half-Life (years) | Decay Time to 7.2 ppb (years from 1/1/1985) |
| MW-15s*  | 1                           | -                                    | -                                                 | -                 | -                                           | 11                          | -0.421                               | 0.764                                             | -1.6              | 33                                          |
| MW-15d*  | 2                           | 0.253                                | 0.122                                             | 2.7               | 15                                          | 2                           | 0.193                                | 0.247                                             | 3.6               | 21                                          |
| MW-30d*  | 1626                        | -0.102                               | <0.001                                            | -6.8              | -27                                         | 1626                        | 0.308                                | <0.001                                            | 2.3               | 44                                          |
| MW-72s*  | 94                          | 0.308                                | <0.001                                            | 2.3               | 28                                          | 14                          | 0.303                                | <0.001                                            | 2.3               | 29                                          |
| MW-72d*  | 3598                        | 0.018                                | 0.099                                             | 38.5              | 365                                         | 3500                        | 0.175                                | 0.002                                             | 4.0               | 62                                          |
| MW-79s   | 1174                        | 0.109                                | 0.208                                             | 6.4               | 62                                          | 805                         | 0.050                                | 0.541                                             | 14                | 113                                         |
| MW-81    | 550                         | -0.101                               | 0.009                                             | -6.9              | -18                                         | 530                         | 0.087                                | 0.004                                             | 8.0               | 76                                          |
| MW-83s*  | 644                         | -0.142                               | 0.007                                             | 4.9               | -5                                          | 499                         | 0.043                                | 0.385                                             | 16                | 120                                         |
| MW-84s*  | 859                         | -0.172                               | 0.001                                             | 4.0               | -2                                          | 908                         | 0.072                                | 0.371                                             | 9.6               | 92                                          |
| MW-85*   | 2476                        | -0.050                               | 0.216                                             | -13.8             | -89                                         | 2476                        | 0.140                                | 0.005                                             | 5.0               | 67                                          |
| MW-88    | 1285                        | 0.147                                | 0.071                                             | 4.7               | 54                                          | 572                         | 0.132                                | 0.220                                             | 5.3               | 58                                          |
| MW-101   | 497                         | 0.017                                | 0.489                                             | -38.7             | -204                                        | 399                         | 0.168                                | 0.009                                             | 4.1               | 50                                          |
| MW-105s* | 3803                        | 0.244                                | 0.001                                             | 2.8               | 47                                          | 1097                        | 0.122                                | 0.008                                             | 5.7               | 67                                          |
| MW-105d* | 1104                        | 0.096                                | 0.034                                             | 7.2               | 73                                          | 699                         | 0.172                                | 0.002                                             | 4.0               | 52                                          |
| MW-106s* | 1676                        | 0.366                                | 0.001                                             | 1.9               | 37                                          | 355                         | 0.016                                | 0.518                                             | 43                | 258                                         |
| MW-108s* | 2946                        | 0.081                                | 0.006                                             | 8.6               | 96                                          | 2157                        | 0.255                                | 0.001                                             | 2.7               | 46                                          |
| MW-108d* | 4054                        | 0.080                                | 0.047                                             | 8.7               | 100                                         | 3003                        | 0.146                                | <0.001                                            | 4.7               | 68                                          |
| MW-115   | 1304                        | 0.178                                | 0.009                                             | 3.9               | 52                                          | 734                         | 0.104                                | 0.001                                             | 6.7               | 71                                          |
| MW-116   | 1215                        | -0.277                               | 0.043                                             | 2.5               | 8                                           | 1215                        | 0.141                                | 0.006                                             | 4.9               | 60                                          |
| MW-119   | 475                         | 0.080                                | 0.687                                             | -8.6              | -22                                         | 475                         | 0.150                                | 0.200                                             | 4.6               | 49                                          |
| MIN      | 1                           | -0.277                               | -                                                 | -38.7             | -204                                        | 2                           | -0.421                               | -                                                 | -1.6              | 21                                          |
| MEAN     | 1469                        | 0.060                                | -                                                 | 1.3               | 30                                          | 1054                        | 0.118                                | -                                                 | 7.5               | 72                                          |
| MEDIAN   | 1195                        | 0.080                                | -                                                 | 2.8               | 28                                          | 717                         | 0.141                                | -                                                 | 4.8               | 61                                          |
| MAX      | 4054                        | 0.366                                | -                                                 | 38.5              | 365                                         | 3500                        | 0.308                                | -                                                 | 43.3              | 258                                         |

\* = Wells located along the central plume axis

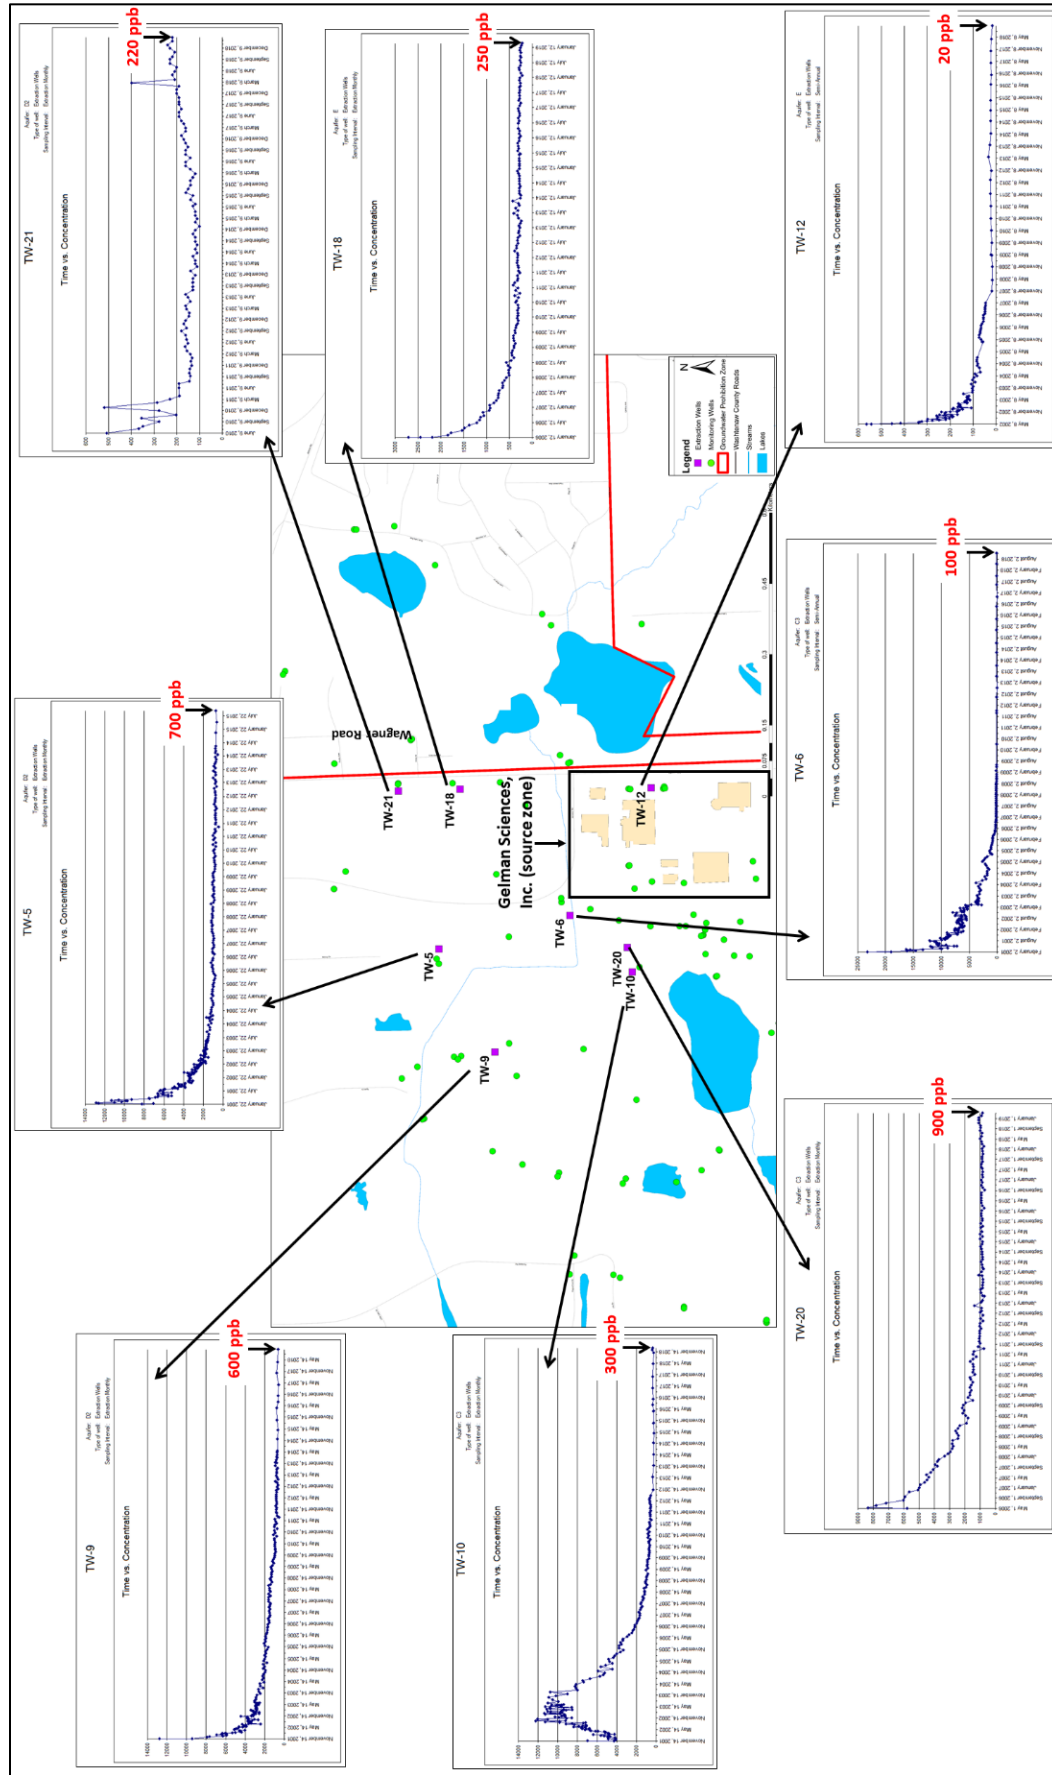

Fig. S1. 1,4-Dioxane concentration histories for extraction wells west of Wagner Road.

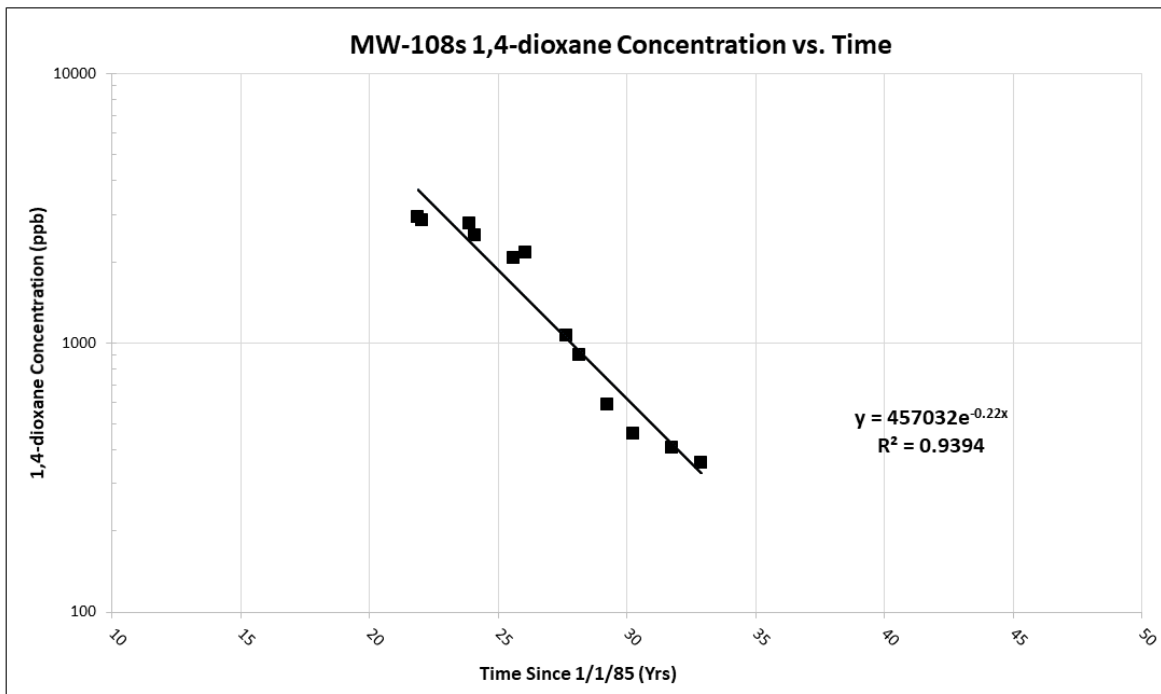

**Fig. S2.** Point attenuation at individual well MW-108s illustrating exponential regression. Note the *negative slope*, suggesting that attenuation is occurring because concentrations are reducing over time.

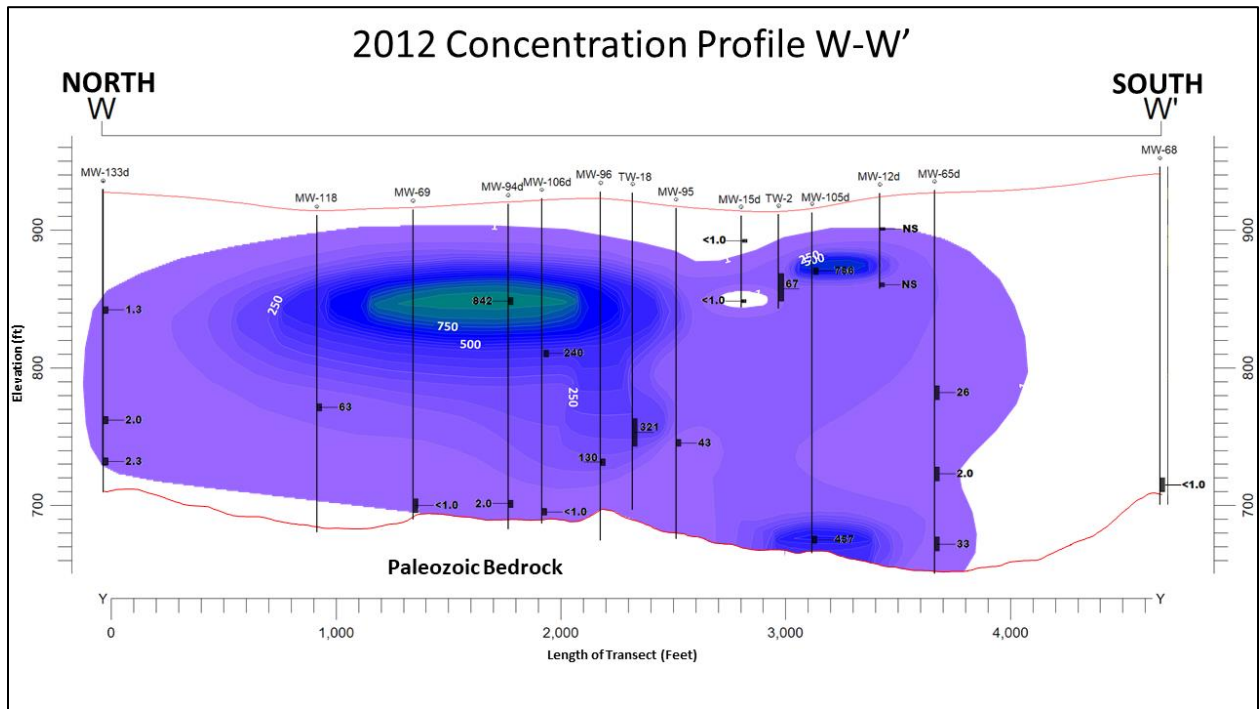

**Fig. S3.** 1,4-Dioxane concentrations used in integrated 2012 mass flux calculations. View looking down gradient.

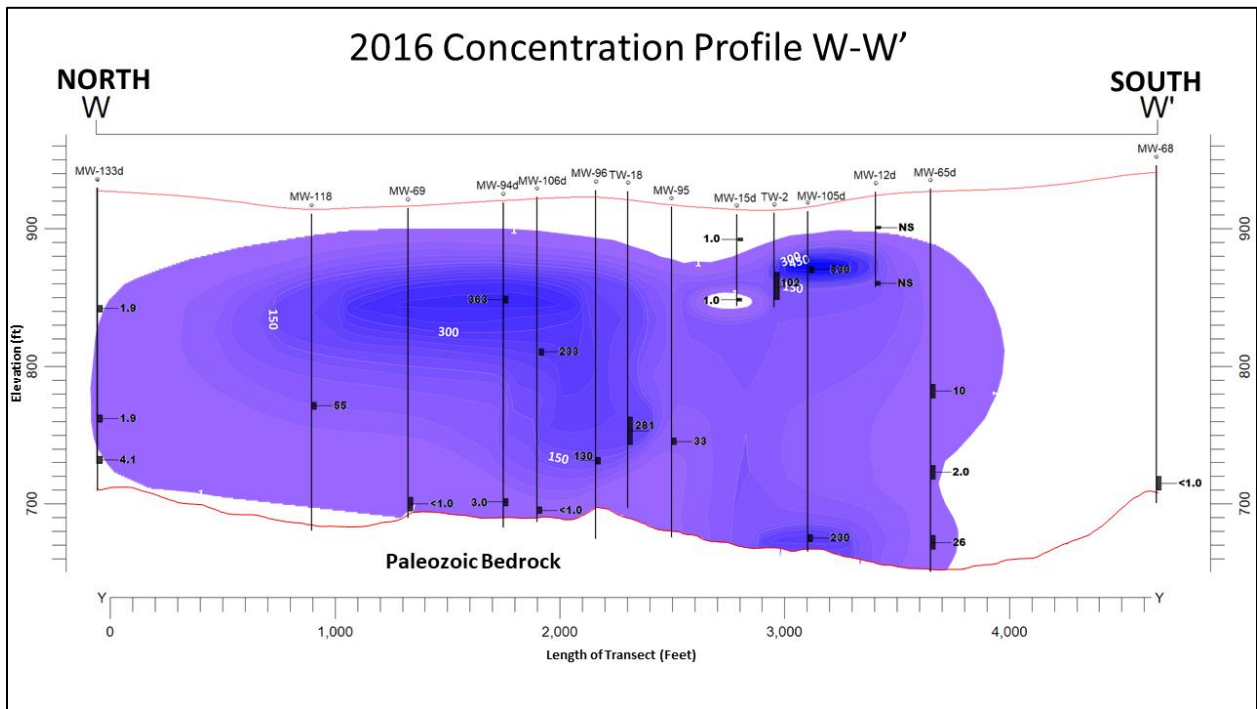

**Fig. S4.** 1,4-Dioxane concentrations used in integrated 2016 mass flux calculations. View looking down gradient.

# 1,4-Dioxane Distribution (Eastern Area)

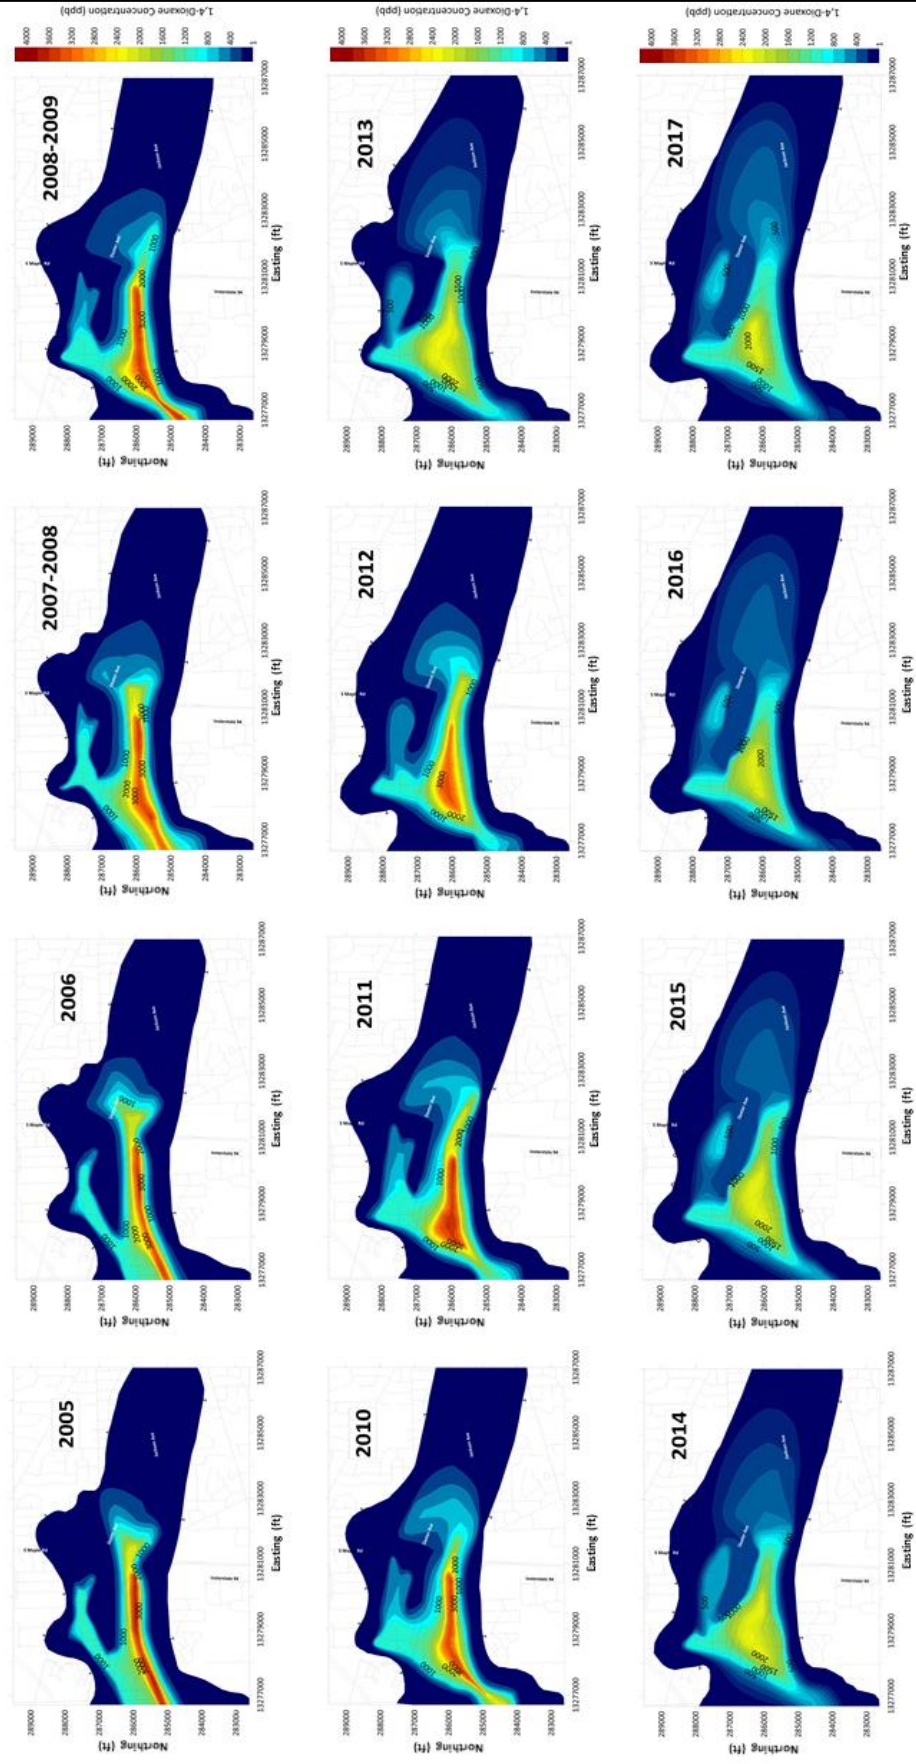

Fig. S5. 1,4-dioxane concentration changes during the entire study period (2005-2017).



Fig. S6. Spatial moment analysis site summary.

| <b>MAROS Site Summary</b>                     |                             |  |                                 |                                               |           |                         |
|-----------------------------------------------|-----------------------------|--|---------------------------------|-----------------------------------------------|-----------|-------------------------|
| <b>Project:</b> Gelman Site-Eastern Area      |                             |  | <b>User Name:</b> JACKSON/LEMKE |                                               |           |                         |
| <b>Location:</b> Ann Arbor                    |                             |  | <b>State:</b> Michigan          |                                               |           |                         |
| <b>User Defined Site and Data Assumptions</b> |                             |  |                                 |                                               |           |                         |
| <b>Hydrogeology and Plume Information:</b>    |                             |  |                                 | <b>Downgradient Information:</b>              |           |                         |
| Groundwater Seepage Velocity: 1 ft/yr         |                             |  |                                 | <b>Distance from Edge of Tail to Nearest:</b> |           |                         |
| Current Plume Length: 12800 ft                |                             |  |                                 | Downgradient receptor: 4800 ft                |           |                         |
| Current Plume Width: 3200 ft                  |                             |  |                                 | Downgradient property: 4800 ft                |           |                         |
| Number of Tail Wells: 49                      |                             |  |                                 | <b>Distance from Source to Nearest:</b>       |           |                         |
| Number of Source Wells: 3                     |                             |  |                                 | Downgradient receptor: 17600 ft               |           |                         |
|                                               |                             |  | Downgradient property: 17600 ft |                                               |           |                         |
| <b>Contaminants of Concern (COC's)</b>        |                             |  |                                 |                                               |           |                         |
| 1,4-DIOXANE (P-DIOXANE)                       |                             |  |                                 |                                               |           |                         |
| <b>Well Summary</b>                           |                             |  |                                 |                                               |           |                         |
| Well Name                                     | Source / Tail / Delineation |  | Record Count                    | Sample Date Range                             |           | Priority Constituent    |
|                                               |                             |  |                                 | Minimum                                       | Maximum   |                         |
| MW-15d                                        | S                           |  | 64                              | 10/15/1987                                    | 7/31/2015 | 1,4-DIOXANE (P-DIOXANE) |
| MW-16                                         | T                           |  | 11                              | 6/10/1994                                     | 8/21/2018 | 1,4-DIOXANE (P-DIOXANE) |
| MW-17                                         | T                           |  | 56                              | 6/7/1990                                      | 1/25/2018 | 1,4-DIOXANE (P-DIOXANE) |
| MW-30d                                        | T                           |  | 75                              | 2/16/2001                                     | 8/28/2018 | 1,4-DIOXANE (P-DIOXANE) |
| MW-54d                                        | T                           |  | 79                              | 8/28/2000                                     | 7/20/2018 | 1,4-DIOXANE (P-DIOXANE) |
| MW-55                                         | T                           |  | 29                              | 8/28/2000                                     | 6/8/2016  | 1,4-DIOXANE (P-DIOXANE) |
| MW-71                                         | T                           |  | 56                              | 10/17/2001                                    | 6/27/2018 | 1,4-DIOXANE (P-DIOXANE) |
| MW-72d                                        | T                           |  | 75                              | 12/6/2001                                     | 7/23/2018 | 1,4-DIOXANE (P-DIOXANE) |
| MW-72s                                        | T                           |  | 51                              | 12/24/2002                                    | 6/26/2018 | 1,4-DIOXANE (P-DIOXANE) |
| MW-76d                                        | T                           |  | 22                              | 4/8/2002                                      | 7/6/2015  | 1,4-DIOXANE (P-DIOXANE) |
| MW-76i                                        | T                           |  | 103                             | 4/8/2002                                      | 9/6/2018  | 1,4-DIOXANE (P-DIOXANE) |
| MW-76s                                        | T                           |  | 119                             | 4/8/2002                                      | 9/6/2018  | 1,4-DIOXANE (P-DIOXANE) |
| MW-77                                         | T                           |  | 67                              | 4/22/2002                                     | 9/24/2018 | 1,4-DIOXANE (P-DIOXANE) |
| MW-79s                                        | T                           |  | 98                              | 7/25/2002                                     | 8/6/2018  | 1,4-DIOXANE (P-DIOXANE) |
| MW-81                                         | T                           |  | 87                              | 11/7/2002                                     | 8/6/2018  | 1,4-DIOXANE (P-DIOXANE) |
| MW-82s                                        | T                           |  | 46                              | 11/7/2002                                     | 9/21/2018 | 1,4-DIOXANE (P-DIOXANE) |

# MAROS Site Summary

Gelman Site-Eastern Area

User Name: JACKSON/LEMKE

Ann Arbor

State: Michigan

|         |   |     |            |           |                         |
|---------|---|-----|------------|-----------|-------------------------|
| MW-83s  | T | 48  | 10/16/2002 | 6/5/2018  | 1,4-DIOXANE (P-DIOXANE) |
| MW-84s  | T | 122 | 1/6/2003   | 9/6/2018  | 1,4-DIOXANE (P-DIOXANE) |
| MW-85   | T | 115 | 3/14/2003  | 8/6/2018  | 1,4-DIOXANE (P-DIOXANE) |
| MW-87d  | T | 93  | 7/24/2003  | 2/2/2017  | 1,4-DIOXANE (P-DIOXANE) |
| MW-87s  | T | 98  | 9/15/2003  | 2/2/2017  | 1,4-DIOXANE (P-DIOXANE) |
| MW-88   | T | 93  | 8/6/2003   | 8/6/2018  | 1,4-DIOXANE (P-DIOXANE) |
| MW-90   | T | 56  | 6/19/2003  | 5/16/2018 | 1,4-DIOXANE (P-DIOXANE) |
| MW-91   | T | 28  | 7/14/2006  | 5/22/2018 | 1,4-DIOXANE (P-DIOXANE) |
| MW-92   | T | 47  | 8/30/2004  | 5/16/2018 | 1,4-DIOXANE (P-DIOXANE) |
| MW-98d  | T | 35  | 4/3/2006   | 6/12/2018 | 1,4-DIOXANE (P-DIOXANE) |
| MW-100  | T | 41  | 4/4/2006   | 9/12/2017 | 1,4-DIOXANE (P-DIOXANE) |
| MW-101  | T | 63  | 4/4/2006   | 8/16/2018 | 1,4-DIOXANE (P-DIOXANE) |
| MW-103d | T | 56  | 4/7/2006   | 8/9/2018  | 1,4-DIOXANE (P-DIOXANE) |
| MW-103s | T | 113 | 4/7/2006   | 9/6/2018  | 1,4-DIOXANE (P-DIOXANE) |
| MW-104  | T | 35  | 8/3/2011   | 8/16/2018 | 1,4-DIOXANE (P-DIOXANE) |
| MW-105d | S | 33  | 8/3/2006   | 8/23/2017 | 1,4-DIOXANE (P-DIOXANE) |
| MW-105s | S | 50  | 8/3/2006   | 8/13/2018 | 1,4-DIOXANE (P-DIOXANE) |
| MW-106d | T | 12  | 8/3/2006   | 1/17/2011 | 1,4-DIOXANE (P-DIOXANE) |
| MW-106s | T | 51  | 8/3/2006   | 8/9/2018  | 1,4-DIOXANE (P-DIOXANE) |
| MW-107  | T | 56  | 11/9/2006  | 8/21/2018 | 1,4-DIOXANE (P-DIOXANE) |
| MW-108d | T | 55  | 11/9/2006  | 8/13/2018 | 1,4-DIOXANE (P-DIOXANE) |
| MW-108s | T | 40  | 11/9/2006  | 8/13/2018 | 1,4-DIOXANE (P-DIOXANE) |
| MW-110  | T | 51  | 2/12/2007  | 6/8/2018  | 1,4-DIOXANE (P-DIOXANE) |
| MW-112d | T | 3   | 10/18/2017 | 5/1/2018  | 1,4-DIOXANE (P-DIOXANE) |
| MW-112i | T | 97  | 5/10/2007  | 9/5/2018  | 1,4-DIOXANE (P-DIOXANE) |
| MW-112s | T | 10  | 11/4/2014  | 3/7/2016  | 1,4-DIOXANE (P-DIOXANE) |
| MW-113  | T | 45  | 12/11/2007 | 8/16/2018 | 1,4-DIOXANE (P-DIOXANE) |
| MW-115  | T | 60  | 11/30/2007 | 8/17/2018 | 1,4-DIOXANE (P-DIOXANE) |
| MW-116  | T | 37  | 11/30/2007 | 8/17/2018 | 1,4-DIOXANE (P-DIOXANE) |
| MW-118  | T | 45  | 2/13/2008  | 8/7/2018  | 1,4-DIOXANE (P-DIOXANE) |
| MW-119  | T | 36  | 11/12/2008 | 5/22/2018 | 1,4-DIOXANE (P-DIOXANE) |
| MW-121d | T | 23  | 2/14/2013  | 7/16/2018 | 1,4-DIOXANE (P-DIOXANE) |
| MW-122s | T | 41  | 12/16/2008 | 8/27/2018 | 1,4-DIOXANE (P-DIOXANE) |
| MW-129d | T | 19  | 3/11/2015  | 1/19/2018 | 1,4-DIOXANE (P-DIOXANE) |
| MW-130i | T | 18  | 10/22/2014 | 7/17/2018 | 1,4-DIOXANE (P-DIOXANE) |
| MW-133d | T | 31  | 8/18/2011  | 7/23/2018 | 1,4-DIOXANE (P-DIOXANE) |



Fig S7. Spatial moment analysis summary.

# MAROS Spatial Moment Analysis Summary

Project: Gelman Site-Eastern Area

User Name: JACKSON/LEMKE

Location: Ann Arbor

State: Michigan

| Effective Date                 | <u>0th Moment</u>   | <u>1st Moment (Center of Mass)</u> |         | Source Distance | <u>2nd Moment (Spread)</u> |                  | Number of Wells |
|--------------------------------|---------------------|------------------------------------|---------|-----------------|----------------------------|------------------|-----------------|
|                                | Estimated Mass (Kg) | Xc (ft)                            | Yc (ft) |                 | Sigma XX (sq ft)           | Sigma YY (sq ft) |                 |
| <b>1,4-DIOXANE (P-DIOXANE)</b> |                     |                                    |         |                 |                            |                  |                 |
| 7/1/2006                       | 6.4E+03             | 13,279,793                         | 285,716 | 4,374           | 2,524,844                  | 430,869          | 36              |
| 7/1/2007                       | 8.1E+03             | 13,279,910                         | 285,789 | 4,512           | 2,507,251                  | 519,839          | 40              |
| 7/1/2008                       | 8.7E+03             | 13,279,829                         | 285,883 | 4,487           | 2,597,329                  | 583,372          | 43              |
| 7/1/2009                       | 1.0E+04             | 13,279,824                         | 285,876 | 4,479           | 3,331,904                  | 617,804          | 40              |
| 7/1/2010                       | 1.1E+04             | 13,279,883                         | 285,910 | 4,547           | 3,266,811                  | 633,127          | 39              |
| 7/1/2011                       | 1.2E+04             | 13,279,757                         | 285,969 | 4,469           | 2,571,501                  | 687,680          | 44              |
| 7/1/2012                       | 1.2E+04             | 13,279,783                         | 286,004 | 4,509           | 2,887,706                  | 680,771          | 41              |
| 7/1/2013                       | 1.0E+04             | 13,280,001                         | 286,139 | 4,765           | 2,892,116                  | 687,548          | 42              |
| 7/1/2014                       | 8.5E+03             | 13,280,131                         | 286,519 | 5,081           | 3,175,277                  | 451,615          | 46              |
| 7/1/2015                       | 7.8E+03             | 13,280,040                         | 286,554 | 5,027           | 2,796,952                  | 483,218          | 50              |
| 7/1/2016                       | 7.3E+03             | 13,280,271                         | 286,413 | 5,140           | 3,654,771                  | 486,693          | 46              |
| 7/1/2017                       | 7.4E+03             | 13,280,358                         | 286,609 | 5,319           | 3,581,780                  | 476,993          | 46              |

# MAROS Spatial Moment Analysis Summary

Project: Gelman Site-Eastern Area

User Name: JACKSON/LEMKE

Location: Ann Arbor

State: Michigan

## Spatial Moment Analysis Summary:

| Moment Type     | Constituent             | Coefficient of Variation | Mann-Kendall S Statistic | Confidence in Trend | Moment Trend |
|-----------------|-------------------------|--------------------------|--------------------------|---------------------|--------------|
| 0th Moment      | 1,4-DIOXANE (P-DIOXANE) | 0.20                     | -6                       | 63.1%               | S            |
| First Moment    | 1,4-DIOXANE (P-DIOXANE) | 0.07                     | 46                       | 100.0%              | I            |
| Second Moment X | 1,4-DIOXANE (P-DIOXANE) | 0.14                     | 32                       | 98.4%               | I            |
| Second Moment Y | 1,4-DIOXANE (P-DIOXANE) | 0.17                     | 2                        | 52.7%               | NT           |

Note: The following assumptions were applied for the calculation of the Zeroth Moment:

**Porosity:** 0.30

**Saturated Thickness:** Uniform: 130 ft

Mann-Kendall Trend test performed on all sample events for each constituent. Increasing (I); Probably Increasing (PI); Stable (S); Probably Decreasing (PD); Decreasing (D); No Trend (NT); Not Applicable (N/A)-Due to insufficient Data (< 4 sampling events); (ND) Non Detect.

Note: The Sigma XX and Sigma YY components are estimated using the given field coordinate system and then rotated to align with the estimated groundwater flow direction. Moments are not calculated for sample events with less than 6 wells.

Fig. S8. Zeroth moment analysis results.

# MAROS Zeroth Moment Analysis

Project: Gelman Site-Eastern Area

User Name: JACKSON/LEMKE

Location: Ann Arbor

State: Michigan

## Change in Dissolved Mass Over Time

COC: 1,4-DIOXANE (P-DIOXANE)

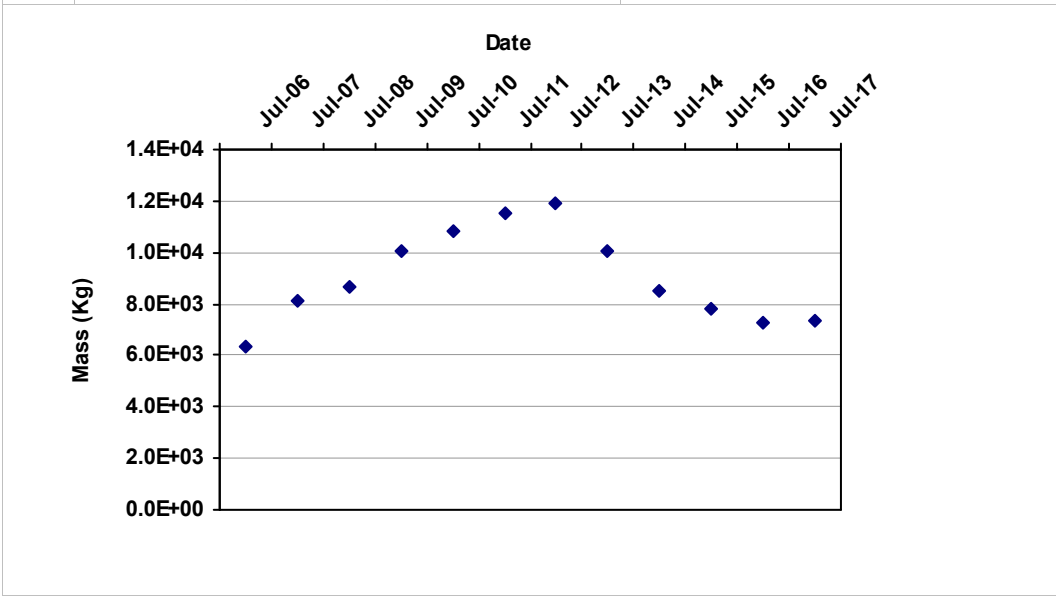

**Porosity:** 0.30

---

**Saturated Thickness:**  
Uniform: 130 ft

---

**Mann-Kendall S Statistic:**  
-6

---

**Confidence in Trend:**  
63.1%

---

**Coefficient of Variation:**  
0.20

---

**Zeroth Moment Trend:**  
S

## Data Table:

| Effective Date | Constituent             | Estimated Mass (Kg) | Number of Wells |
|----------------|-------------------------|---------------------|-----------------|
| 7/1/2006       | 1,4-DIOXANE (P-DIOXANE) | 6.4E+03             | 36              |
| 7/1/2007       | 1,4-DIOXANE (P-DIOXANE) | 8.1E+03             | 40              |
| 7/1/2008       | 1,4-DIOXANE (P-DIOXANE) | 8.7E+03             | 43              |
| 7/1/2009       | 1,4-DIOXANE (P-DIOXANE) | 1.0E+04             | 40              |
| 7/1/2010       | 1,4-DIOXANE (P-DIOXANE) | 1.1E+04             | 39              |
| 7/1/2011       | 1,4-DIOXANE (P-DIOXANE) | 1.2E+04             | 44              |
| 7/1/2012       | 1,4-DIOXANE (P-DIOXANE) | 1.2E+04             | 41              |
| 7/1/2013       | 1,4-DIOXANE (P-DIOXANE) | 1.0E+04             | 42              |
| 7/1/2014       | 1,4-DIOXANE (P-DIOXANE) | 8.5E+03             | 46              |
| 7/1/2015       | 1,4-DIOXANE (P-DIOXANE) | 7.8E+03             | 50              |
| 7/1/2016       | 1,4-DIOXANE (P-DIOXANE) | 7.3E+03             | 46              |
| 7/1/2017       | 1,4-DIOXANE (P-DIOXANE) | 7.4E+03             | 46              |

Note: Increasing (I); Probably Increasing (PI); Stable (S); Probably Decreasing (PD); Decreasing (D); No Trend (NT); Not Applicable (N/A) - Due to insufficient Data (< 4 sampling events); ND = Non-detect. Moments are not calculated for sample events with less than 6 wells.

Fig. S9. First moment analysis results - distance from source to center of mass.

# MAROS First Moment Analysis

|                                                                        |                                                           |
|------------------------------------------------------------------------|-----------------------------------------------------------|
| <b>Project:</b> Gelman Site-Eastern Area<br><b>Location:</b> Ann Arbor | <b>User Name:</b> JACKSON/LEMKE<br><b>State:</b> Michigan |
|------------------------------------------------------------------------|-----------------------------------------------------------|

**COC:** 1,4-DIOXANE (P-DIOXANE)

**Distance from Source to Center of Mass**

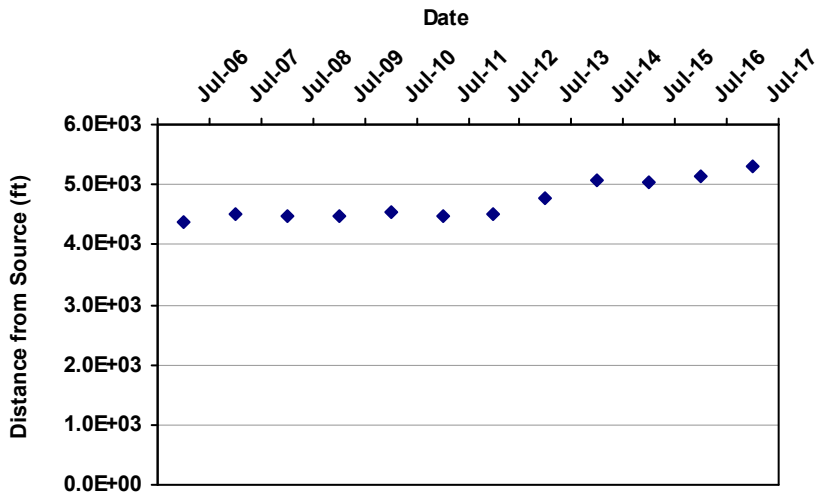

**Mann-Kendall S Statistic:**

46

**Confidence in Trend:**

100.0%

**Coefficient of Variation:**

0.07

**First Moment Trend:**

I

**DATA TABLE**

| Effective Date | Constituent             | Xc (ft)    | Yc (ft) | Distance from Source | Number of Wells |
|----------------|-------------------------|------------|---------|----------------------|-----------------|
| 7/1/2006       | 1,4-DIOXANE (P-DIOXANE) | 13,279,793 | 285,716 | 4,374                | 36              |
| 7/1/2007       | 1,4-DIOXANE (P-DIOXANE) | 13,279,910 | 285,789 | 4,512                | 40              |
| 7/1/2008       | 1,4-DIOXANE (P-DIOXANE) | 13,279,829 | 285,883 | 4,487                | 43              |
| 7/1/2009       | 1,4-DIOXANE (P-DIOXANE) | 13,279,824 | 285,876 | 4,479                | 40              |
| 7/1/2010       | 1,4-DIOXANE (P-DIOXANE) | 13,279,883 | 285,910 | 4,547                | 39              |
| 7/1/2011       | 1,4-DIOXANE (P-DIOXANE) | 13,279,757 | 285,969 | 4,469                | 44              |
| 7/1/2012       | 1,4-DIOXANE (P-DIOXANE) | 13,279,783 | 286,004 | 4,509                | 41              |
| 7/1/2013       | 1,4-DIOXANE (P-DIOXANE) | 13,280,001 | 286,139 | 4,765                | 42              |
| 7/1/2014       | 1,4-DIOXANE (P-DIOXANE) | 13,280,131 | 286,519 | 5,081                | 46              |
| 7/1/2015       | 1,4-DIOXANE (P-DIOXANE) | 13,280,040 | 286,554 | 5,027                | 50              |
| 7/1/2016       | 1,4-DIOXANE (P-DIOXANE) | 13,280,271 | 286,413 | 5,140                | 46              |
| 7/1/2017       | 1,4-DIOXANE (P-DIOXANE) | 13,280,358 | 286,609 | 5,319                | 46              |

Note: Increasing (I); Probably Increasing (PI); Stable (S); Probably Decreasing (PD); Decreasing (D); No Trend (NT); Not Applicable (N/A) - Due to insufficient Data (< 4 sampling events). Moments are not calculated for sample events with less than 6 wells.

Fig. S10. First moment analysis results - change in location of center of mass over time.

# MAROS First Moment Analysis

Project: Gelman Site-Eastern Area      User Name: JACKSON/LEMKE  
 Location: Ann Arbor      State: Michigan

COC: 1,4-DIOXANE (P-DIOXANE)

## Change in Location of Center of Mass Over Time

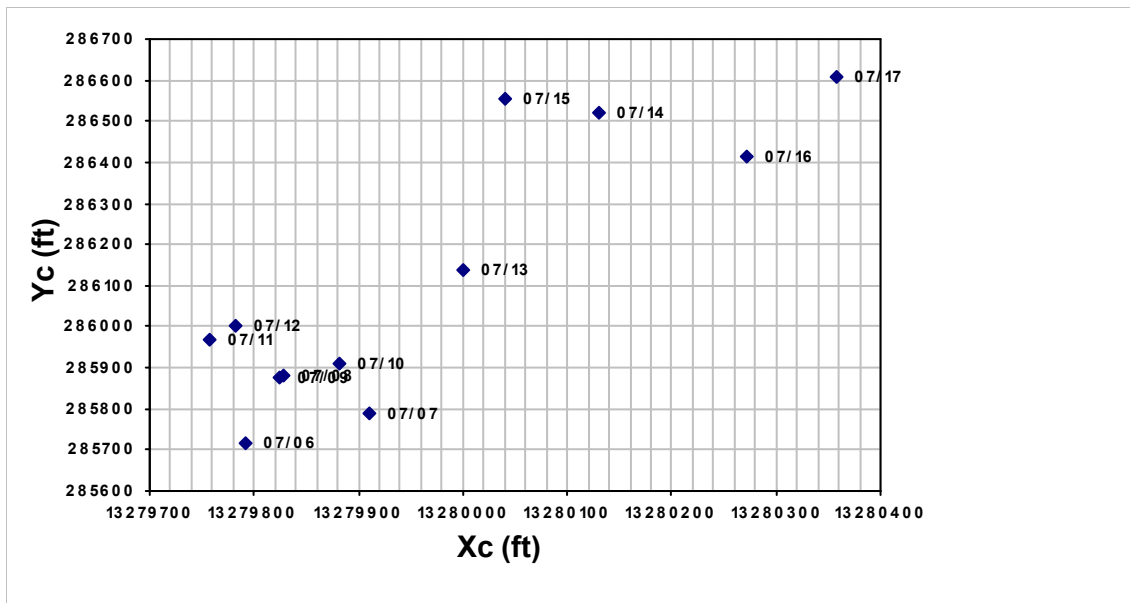

**Groundwater Flow Direction:**

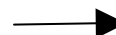

**Source Coordinates**

X: 13,275,936

Y: 283,652

| Effective Date | Constituent       | Xc (ft)    | Yc (ft) | Distance from Source (ft) | Number of Wells |
|----------------|-------------------|------------|---------|---------------------------|-----------------|
| 7/1/2006       | 1,4-DIOXANE (P-D) | 13,279,793 | 285,716 | 4,374                     | 36              |
| 7/1/2007       | 1,4-DIOXANE (P-D) | 13,279,910 | 285,789 | 4,512                     | 40              |
| 7/1/2008       | 1,4-DIOXANE (P-D) | 13,279,829 | 285,883 | 4,487                     | 43              |
| 7/1/2009       | 1,4-DIOXANE (P-D) | 13,279,824 | 285,876 | 4,479                     | 40              |
| 7/1/2010       | 1,4-DIOXANE (P-D) | 13,279,883 | 285,910 | 4,547                     | 39              |
| 7/1/2011       | 1,4-DIOXANE (P-D) | 13,279,757 | 285,969 | 4,469                     | 44              |
| 7/1/2012       | 1,4-DIOXANE (P-D) | 13,279,783 | 286,004 | 4,509                     | 41              |
| 7/1/2013       | 1,4-DIOXANE (P-D) | 13,280,001 | 286,139 | 4,765                     | 42              |
| 7/1/2014       | 1,4-DIOXANE (P-D) | 13,280,131 | 286,519 | 5,081                     | 46              |
| 7/1/2015       | 1,4-DIOXANE (P-D) | 13,280,040 | 286,554 | 5,027                     | 50              |
| 7/1/2016       | 1,4-DIOXANE (P-D) | 13,280,271 | 286,413 | 5,140                     | 46              |
| 7/1/2017       | 1,4-DIOXANE (P-D) | 13,280,358 | 286,609 | 5,319                     | 46              |

Note: Increasing (I); Probably Increasing (PI); Stable (S); Probably Decreasing (PD); Decreasing (D); No Trend (NT); Not Applicable (N/A) - Due to insufficient Data (< 4 sampling events). Moments are not calculated for sample events with less than 6 wells.
